# Supplementary material
Source: publisher figshare collection journal article supplement (https://tandf.figshare.com/articles/dataset/_/24159020)
Supplement: Supplementary file 1 [file 1]

**Supplementary material S3: Tables**

**Supplementary Table S1:** Measurements for Zorocallida.

| **Higher taxonomy** | **Genus** | **Species** | **R (mm)** | **R (mm)** | **Geological age** | **Reference** |
| --- | --- | --- | --- | --- | --- | --- |
| Zoroasteridae | *Doraster* | *constellatus* | 220 | 32 | Recent | Clark & Downey, 1992 |
| Zoroasteridae | *Cnemidaster* | *sigsbeei* | 70 | 10 | Recent | Clark & Downey, 1992 |
| Zoroasteridae | *Zoroaster* | *fulgens* | 150 | 10 | Recent | Clark & Downey, 1992 |
| Zoroasteridae | *Zoroaster* | *whangareiensis* | 115 | 19 | Paleogene | Eagle, 2006 |
| Zoroasteridae | *Zoroaster* | *marambioensis* | 150 | 18 | Paleogene | Palópolo et al. 2021 |
| Zoroasteridae | *Doraster* | *mizunoi* | 63 | 6 | Neogene | Kato & Oji, 2013 |
| Zorocallida | *Alkaidia* | *sumrali* | 43 | 6 | Cretaceous | Blake & Reid, 1998 |
| Zorocallida | *Viridisaster* | *guerangeri* | 38 | 5 | Cretaceous | This study |
| Zorocallida | *Alkaidia* | *megaungula* | 8 | 3 | Cretaceous | Ewin & Gale, 2020 |
| Zorocallida | *Protothyraster* | *priscus* | 19 | 4 | Cretaceous | This study |
| Zorocallida | *Terminaster* | *cancriformis* | 11 | 3 | Jurassic | This study |

**Supplementary Table S2:** Measurements for Forcipulatida.

| **Higher taxonomy** | **Genus** | **Species** | **R (mm)** | **R (mm)** | **Geological age** | **Reference** |
| --- | --- | --- | --- | --- | --- | --- |
| Asteriidae | *Anaterias* | *antarctica* | 92 | 25 | Recent | Clark & Downey, 1992 |
| Asteriidae | *Asterias* | *forbesi* | 91 | 16 | Recent | Clark & Downey, 1992 |
| Asteriidae | *Asterias* | *rubens* | 160 | 44 | Recent | Clark & Downey, 1992 |
| Asteriidae | *Coronaster* | *briareus* | 160 | 11 | Recent | Clark & Downey, 1992 |
| Asteriidae | *Coronaster* | *volstellatus* | 110 | 12 | Recent | Clark & Downey, 1992 |
| Asteriidae | *Coscinasterias* | *calamaria* | 60 | 8 | Recent | Clark & Downey, 1992 |
| Asteriidae | *Coscinasterias* | *tenuispina* | 135 | 19 | Recent | Clark & Downey, 1992 |
| Asteriidae | *Diplasterias* | *brandti* | 106 | 20 | Recent | Clark & Downey, 1992 |
| Asteriidae | *Leptasterias* | *austera* | 50 | 12 | Recent | Clark & Downey, 1992 |
| Asteriidae | *Leptasterias* | *compta* | 45 | 9 | Recent | Clark & Downey, 1992 |
| Asteriidae | *Leptasterias* | *danica* | 40 | 7 | Recent | Clark & Downey, 1992 |
| Asteriidae | *Leptasterias* | *hispidella* | 30 | 7 | Recent | Clark & Downey, 1992 |
| Asteriidae | *Leptasterias* | *littoralis* | 40 | 10 | Recent | Clark & Downey, 1992 |
| Asteriidae | *Leptasterias* | *muelleri* | 40 | 7 | Recent | Clark & Downey, 1992 |
| Asteriidae | *Leptasterias* | *tenera* | 40 | 6 | Recent | Clark & Downey, 1992 |
| Asteriidae | *Leptasterias* | *polaris* | 150 | 30 | Recent | Clark & Downey, 1992 |
| Asteriidae | *Lethasterias* | *australis* | 50 | 9 | Recent | Clark & Downey, 1992 |
| Asteriidae | *Marthasterias* | *glacialis* | 300 | 37 | Recent | Clark & Downey, 1992 |
| Asteriidae | *Perissasterias* | *hepatctis* | 270 | 52 | Recent | Clark & Downey, 1992 |
| Asteriidae | *Perissasterias* | *obtusissima* | 160 | 29 | Recent | Clark & Downey, 1992 |
| Asteriidae | *Perissasterias* | *polyacantha* | 310 | 34 | Recent | Clark & Downey, 1992 |
| Asteriidae | *Psalidaster* | *mordax* | 135 | 35 | Recent | Clark & Downey, 1992 |
| Asteriidae | *Sclerasterias* | *contorta* | 134 | 10 | Recent | Clark & Downey, 1992 |
| Asteriidae | *Sclerasterias* | *eustyla* | 60 | 7 | Recent | Clark & Downey, 1992 |
| Asteriidae | *Sclerasterias* | *guernei* | 80 | 12 | Recent | Clark & Downey, 1992 |
| Asteriidae | *Sclerasterias* | *neglecta* | 15 | 3 | Recent | Clark & Downey, 1992 |
| Asteriidae | *Sclerasterias* | *tanneri* | 104 | 15 | Recent | Clark & Downey, 1992 |
| Asteriidae | *Stephanasterias* | *albula* | 60 | 6 | Recent | Clark & Downey, 1992 |
| Asteriidae | *Urasterias* | *lincki* | 300 | 37 | Recent | Clark & Downey, 1992 |
| Pedicellasteridae | *Ampheraster* | *alaminos* | 62 | 8 | Recent | Clark & Downey, 1992 |
| Pedicellasteridae | *Hydrasterias* | *ophiodion* | 28 | 4 | Recent | Clark & Downey, 1992 |
| Pedicellasteridae | *Hydrasterias* | *sexradiata* | 35 | 3 | Recent | Clark & Downey, 1992 |
| Pedicellasteridae | *Pedicellaster* | *pourtalesi* | 21 | 5 | Recent | Clark & Downey, 1992 |
| Pedicellasteridae | *Pedicellaster* | *typicus* | 31 | 3 | Recent | Clark & Downey, 1992 |
| Pedicellasteridae | *Tarsaster* | *fascicularis* | 57 | 9 | Recent | Clark & Downey, 1992 |
| Stichasteridae | *Allostichaster* | *capensis* | 31 | 8 | Recent | Clark & Downey, 1992 |
| Stichasteridae | *Allostichaster* | *hartti* | 18 | 5 | Recent | Clark & Downey, 1992 |
| Stichasteridae | *Cosmasterias* | *felipes* | 90 | 16 | Recent | Clark & Downey, 1992 |
| Stichasteridae | *Cosmasterias* | *lurida* | 240 | 41 | Recent | Clark & Downey, 1992 |
| Stichasteridae | *Neomorphaster* | *forcipatus* | 85 | 16 | Recent | Clark & Downey, 1992 |
| Stichasteridae | *Neomorphaster* | *margaritaceus* | 73 | 13 | Recent | Clark & Downey, 1992 |
| Stichasteridae | *Smilasterias* | *triremis* | 61 | 7 | Recent | Clark & Downey, 1992 |
| Stichasteridae | *Stichastrella* | *ambigua* | 115 | 20 | Recent | Clark & Downey, 1992 |
| Stichasteridae | *Stichastrella* | *rosea* | 150 | 19 | Recent | Clark & Downey, 1992 |
| ‘Asteriidae’ | *Sclerasterias* | *zinsmeisteri* | 98 | 26 | Paleogene | Blake & Aronson, 1998 |
| ‘Asteriidae’ | *Cretasterias* | *reticulatus* | 46 | 13 | Cretaceous | Gale & Villier, 2013 |
| ‘Pedicellasteridae’ | *Afraster* | *scalariformis* | 29 | 6.5 | Cretaceous | Blake et al., 1996 |
| Forcipulatida | *Pegaster* | *stichos* | 51 | 21 | Cretaceous | Blake & Peterson, 1993 |
| Forcipulatida | *‘Compsaster’* | *spiniger* | 39 | 10 | Jurassic | Wright, 1880 |
| Forcipulatida | *‘Asterias’* | *dubium* | 30 | 13 | Jurassic | Whitfield, 1877 |
| Forcipulatida | *"Asterachanton"* | *oolithicum* | 48 | 20 | Jurassic | Terquem & Jourdy, 1869 |
| Forcipulatida | *‘Asterias’* | *deslongchampsi* | 27 | 12 | Jurassic | Morière, 1878 |
| Forcipulatida | *‘Asterias’* | *gaveyi* | 99 | 26 | Jurassic | Forbes, 1850 |
| Forcipulatida | *Dermaster* | *boehmi* | 41 | 14 | Jurassic | Hess, 1972 |
| Forcipulatida | *‘Asterias’* | *ranvillensis* | 21 | 5 | Jurassic | Portes, 1927 |
| Forcipulatida | *Germanasterias* | *amplipapularia* | 105 | 18 | Jurassic | Blake, 1990 |
| Forcipulatida | *Hystrixasterias* | *hettangiurnus* | 31 | 10 | Jurassic | Blake, 1990 |
| Forcipulatida | *Psammaster* | *davidsoni* | 30 | 8 | Jurassic | Fau et al., 2020 |
| Forcipulatida | *Argoviaster* | *occultus* | 90 | 15 | Jurassic | Hess, 1972 |
| Forcipulatida | *Polarasterias* | *janusensis* | 65 | 8 | Jurassic | Rousseau et al., 2018 |

**Reference list**

**Blake, D. B.** 1990. Hettangian Asteriidae (Echinodermata: Asteroidea) from southern Germany: taxonomy, phylogeny and life habits. *Paläontologische Zeitschrift*, **64**, 103–123.

**Blake, D. B. & Aronson, R. B.** 1998. Eocene Stelleroids (Echinodermata) at Seymour Island, Antarctic Peninsula. *Journal of Paleontology*, **72**, 339–353.

**Blake, D. B., Breton, G. & Gofas, S.** 1996. A new genus and species of Asteriidae (Asteroidea; Echinodermata) from the Upper Cretaceous (Coniacian) of Angola, Africa. *Paläontologische* Zeitschrift, **70**, 181–187.

**Blake, D. B. & Peterson, D. O.** 1993. An unusual new asteriid (Echinodermata: Asteroidea) from the Cretaceous of California. *Journal of Paleontology,* **67**, 586–589.

**Blake, D. B. & Reid, R.** 1998. Some Albian (Cretaceous) asteroids (Echinodermata) from Texas and their paleobiological implications. *Journal of Paleontology*, **72**, 512–532.

**Clark, A. M. & Downey, M. E.** 1992. *Starfishes of the Atlantic*. Chapman & Hall, London, 794 pp.

**Eagle, M. K.** 2006. A new asteroid (Forcipulatida: Zoroasteridae) from the Eocene of Whangarei, Northland, New Zealand. *Records of the Auckland Museum*, **43**, 81–96.

**Ewin, T. A. M. & Gale, A. S.** 2020. Asteroids (Echinodermata) from the Barremian (Lower Cretaceous) of the Agadir Basin, west Morocco. *Journal of Paleontology*, **94**, 931–954.

**Fau, M., Villier, L., Ewin, T. A. M. & Gale, A. S.** 2020. A revision of *Psammaster davidsoni* gen. nov., a forcipulatacean asteroid from the Tithonian of Boulogne, France. *Fossil Record*, **23**, 141–149.

**Forbes, E.** 1850. Uraster gaveyi. *Memoirs of the Geological Survey of the United Kingdom:* *Figures and descriptions illustrative of British organic remains,* **decade 3**, 1–2.

**Gale, A. & Villier, L.** 2013. Mass mortality of an asteriid starfish (Forcipulatida, Asteroidea, Echinodermata) from the late Maastrichtian (Late Cretaceous) of Morocco. *Palaeontology,* **56**, 577–588.

**Hess, H. 1972.** Eine Echinodermen-Fauna aus dem mittleren Dogger des Aargauer Juras. *Schweizerische Paläontologische Abhandlungen*, **92**, 1–87.

**Kato, M. & Oji, T.** 2013. A new species of *Doraster* (Echinodermata: Asteroidea) from the lower Miocene of central Japan: implications for its enigmatic paleobiogeography. *Paleontological Research*, **17**(4), 330–334.

**Morière, M. J.** 1878. Note sur une astéride dans l'Oxfordien des Vaches-Noires, entre Dives et Villers-sur-Mer. *Bulletin de la Société Linnéenne de Normandie*, **3**,75–82.

**Palópolo, E. E., Brezina, S. S., Casadio, S., Griffin, M. & Santillana, S.** 2021. A new zoroasterid asteroid from the Eocene of Seymour Island, Antarctica. *Acta Palaeontologica Polonica*, **66**(2), 301–318.

**Porte, M.** 1927. Astéridée nouvelle du Bradfordien de Ranville. *Bulletin de la Société Linnéenne de Normandie*, **9,** 79–80.

**Rousseau, J., Gale, A. S. & Thuy, B.** 2018. New articulated asteroids (Echinodermata, Asteroidea) and ophiuroids (Echinodermata, Ophiuroidea) from the Late Jurassic (Volgian / Tithonian) of central Spitsbergen. *European Journal of Taxonomy*, **411**, 1–26.

**Terquem, O. & Jourdy, E.** 1869. Monographie de l'étage Bathonien dans le département de la Moselle. *Mémoire de la Société Géologique de France* *série 2*, **9**, 1–175.

**Whitfield, R. P.** 1877. Preliminary report on the paleontology of the Black Hills, containing descriptions of new species of fossils from the Potsdam, Jurassic, and Cretaceous formations of the Black Hills of Dakota. *U.S. Geographical and Geological Survey, Rocky Mountain Region,* Final Report 49 pp.

**Wright, T.** 1863–1880. Monograph on the British fossil Echinodermata of the Oolitic Formations. Volume II: The Asteroidea and Ophiuroidea. *Monographs of the Palaeontographical Society* 1862, 1–130; 1866, 131–154; 1880, 155–203.
